# Supplementary material for: Diabetes fuels periodontal lesions via GLUT1-driven macrophage inflammaging
Source: PubMed Central journal article supplement (PMC7990943; doi:10.1038/s41368-021-00116-6), 2021-03-24

# Extended Data Fig. 3

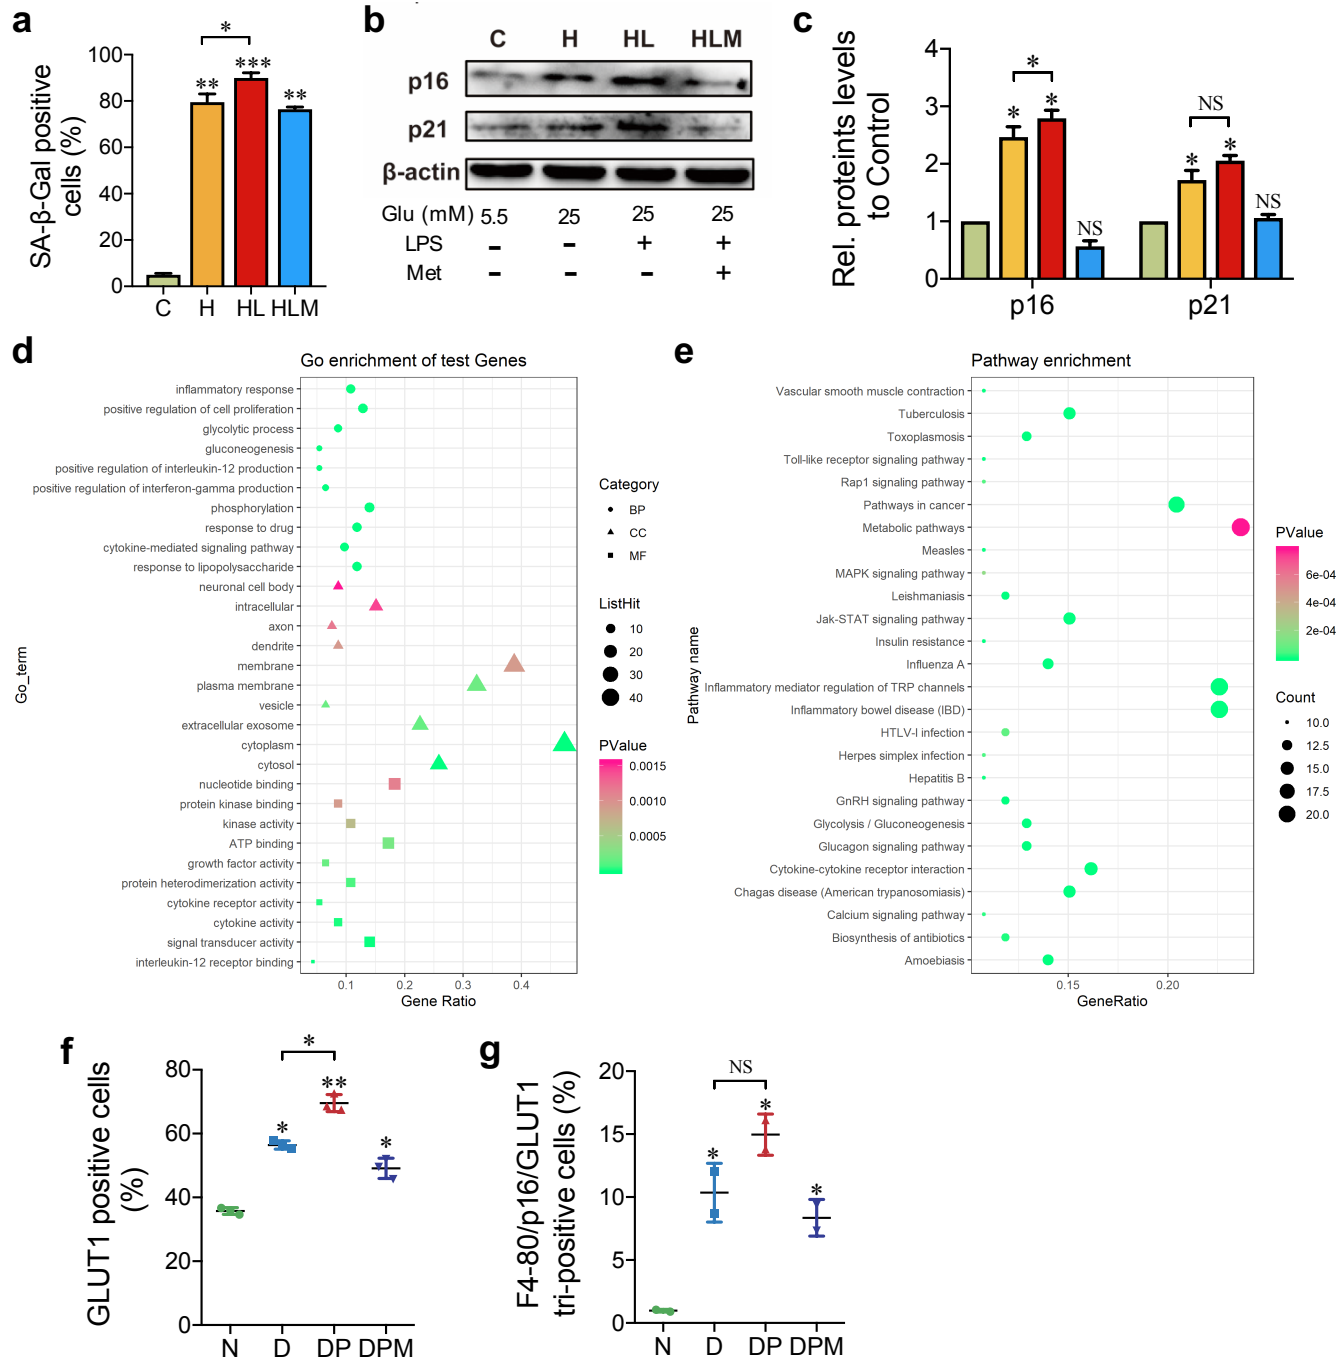

Supplement: 41368_2021_116_MOESM4_ESM.pdf [file 41368_2021_116_MOESM4_ESM.pdf]
